# Supplementary material
Source: HighWire-hosted journal article supplement (https://erj.ersjournals.com/content/51/2/1701963)
Supplement: inline-supplementary-material-1 [file inline-supplementary-material-1.pdf]

## **Supplementary information**

### **The role of air pollution and lung function on cognitive impairment**

Anke Hüls<sup>1</sup>, Andrea Vierkötter<sup>1</sup>, Dorothea Sugiri<sup>1</sup>, Michael J. Abramson<sup>2</sup>, Ulrich Ranft<sup>1</sup>, Ursula Krämer<sup>1</sup>, Tamara Schikowski<sup>1</sup>

<sup>1</sup> IUF-Leibniz Research Institute for Environmental Medicine, Düsseldorf, Germany

<sup>2</sup> School of Public Health & Preventive Medicine, Monash University, Melbourne, Australia

#### **Corresponding author:**

Tamara Schikowski, MPH, PhD

Auf'm Hennekamp 50

40225 Düsseldorf

Email: [tamara.schikowski@iuf-duesseldorf.de](mailto:tamara.schikowski@iuf-duesseldorf.de)

Ph: +49 211 3389 341

Fax: +49 211 3389 283

**Table S1:** Comparison of baseline characteristics of participants lost to follow-up and participants included in the analyses. Differences in the continuous variables were tested with the two-sample t-test and differences in the categorical variables were tested with Fisher's exact test at the 5% significance level.

|                                                        | Lost between baseline and follow-up investigation<br>(N=2785 with lung function at baseline) |                 |         | Lost due to selection of complete cases used in analysis<br>(N=834 at follow-up investigation) |                 |         |
|--------------------------------------------------------|----------------------------------------------------------------------------------------------|-----------------|---------|------------------------------------------------------------------------------------------------|-----------------|---------|
|                                                        | Lost                                                                                         | Available       | p-value | Lost                                                                                           | Available       | p-value |
| N                                                      | 1951                                                                                         | 834             |         | 314                                                                                            | 520             |         |
| BMI [kg/m <sup>2</sup> ], Mean (SD)                    | 28.0 (4.8)                                                                                   | 26.7 (3.9)      | <0.001  | 26.9 (3.7)                                                                                     | 26.6 (4.0)      | 0.209   |
| Educational level, n/N (%)                             |                                                                                              |                 |         |                                                                                                |                 |         |
| <10 years                                              | 569/1948 (29.2%)                                                                             | 144/813 (17.7%) | <0.001  | 52/293 (17.7%)                                                                                 | 92/520 (17.7%)  | 0.481   |
| =10 years                                              | 957/1948 (49.1%)                                                                             | 396/813 (48.7%) |         | 150/293 (51.2%)                                                                                | 246/520 (47.3%) |         |
| >10 years                                              | 422/1948 (21.7%)                                                                             | 273/813 (33.6%) |         | 91/293 (31.1%)                                                                                 | 182/520 (35.0%) |         |
| Smoking, n/N (%)                                       |                                                                                              |                 |         |                                                                                                |                 |         |
| Active smoker                                          | 298/1872 (15.9%)                                                                             | 85/833 (10.2%)  | <0.001  | 29/313 (9.3%)                                                                                  | 56/520 (10.8%)  | 0.731   |
| Ex-smoker                                              | 144/1872 (7.7%)                                                                              | 84/833 (10.1%)  |         | 30/313 (9.6%)                                                                                  | 54/520 (10.4%)  |         |
| Never smoker                                           | 1430/1872 (76.4%)                                                                            | 664/833 (79.7%) |         | 254/313 (81.2%)                                                                                | 410/520 (78.8%) |         |
| Passive smoking, n/N (%)                               | 965/1919 (50.3%)                                                                             | 390/828 (47.1%) | 0.134   | 145/308 (47.1%)                                                                                | 245/520 (47.1%) | 1.000   |
| Urban area, n/N (%)                                    | 993/1951 (50.9%)                                                                             | 439/834 (52.6%) | 0.408   | 209/314 (66.6%)                                                                                | 230/520 (44.2%) | <0.001  |
| Rural area, n/N (%)                                    | 958/1951 (49.1%)                                                                             | 395/834 (47.4%) |         | 105/314 (33.4%)                                                                                | 290/520 (55.8%) |         |
| PM <sub>2.5</sub> , (µg/m <sup>3</sup> ), Median (IQR) | 33.4 (3.8)                                                                                   | 33.3 (4.7)      | <0.001  | 33.6 (4.2)                                                                                     | 33.0 (4.9)      | 0.004   |
| PM <sub>10</sub> , (µg/m <sup>3</sup> ), Median (IQR)  | 51.3 (5.0)                                                                                   | 50.2 (6.8)      | <0.001  | 50.7 (5.4)                                                                                     | 49.8 (8.0)      | 0.002   |
| NO <sub>2</sub> , (µg/m <sup>3</sup> ), Median (IQR)   | 36.1 (17.4)                                                                                  | 34.7 (14.7)     | <0.001  | 37.9 (14.5)                                                                                    | 33.5 (13.8)     | <0.001  |
| GLI z-score FEV1, Mean (SD)                            | -0.6 (1.1)                                                                                   | -0.3 (1.0)      | <0.001  | -0.3 (1.1)                                                                                     | -0.2 (1.0)      | 0.531   |
| GLI z-score FVC, Mean (SD)                             | -0.3 (1.0)                                                                                   | 0.0 (0.9)       | <0.001  | -0.1 (1.0)                                                                                     | 0.0 (0.9)       | 0.276   |
| GLI z-score FEV1/FVC, Mean (SD)                        | -0.5 (0.9)                                                                                   | -0.4 (0.8)      | 0.046   | -0.4 (0.9)                                                                                     | -0.4 (0.8)      | 0.445   |

**Table S2:** Mediation analysis (exposure: air pollution; mediator: lung function; outcome: visuo-construction performance (figure copying)) in all participants (N=520). Indirect, direct and total effects (95% confidence intervals and p-values).

|                                         | Mediator         | Exposure          | Indirect effects              |         | Direct effects                |         | Total effects                 |         |
|-----------------------------------------|------------------|-------------------|-------------------------------|---------|-------------------------------|---------|-------------------------------|---------|
|                                         |                  |                   | $\beta$ -estimate<br>(95%-CI) | p-value | $\beta$ -estimate<br>(95%-CI) | p-value | $\beta$ -estimate<br>(95%-CI) | p-value |
| Without exposure x mediator interaction |                  |                   |                               |         |                               |         |                               |         |
| FEV <sub>1</sub>                        | PM <sub>10</sub> | PM <sub>10</sub>  | -0.02 (-0.05;0.00)            | 0.068   | -0.30 (-0.47;-0.13)           | <0.001  | -0.31 (-0.49;-0.15)           | <0.001  |
|                                         |                  | PM <sub>2.5</sub> | -0.02 (-0.04;0.00)            | 0.062   | -0.22 (-0.38;-0.07)           | 0.008   | -0.24 (-0.40;-0.09)           | 0.004   |
|                                         |                  | NO <sub>2</sub>   | -0.02 (-0.05;0.00)            | 0.104   | -0.23 (-0.45;0.00)            | 0.046   | -0.24 (-0.47;-0.02)           | 0.032   |
| FVC                                     | PM <sub>10</sub> | PM <sub>10</sub>  | -0.01 (-0.04;0.01)            | 0.160   | -0.30 (-0.47;-0.14)           | <0.001  | -0.32 (-0.49;-0.15)           | <0.001  |
|                                         |                  | PM <sub>2.5</sub> | -0.01 (-0.04;0.01)            | 0.164   | -0.23 (-0.38;-0.07)           | 0.008   | -0.24 (-0.40;-0.09)           | 0.004   |
|                                         |                  | NO <sub>2</sub>   | -0.02 (-0.05;0.01)            | 0.188   | -0.23 (-0.45;-0.01)           | 0.044   | -0.24 (-0.46;-0.02)           | 0.034   |
| FEV <sub>1</sub> /FVC                   | PM <sub>10</sub> | PM <sub>10</sub>  | 0.01 (-0.01;0.04)             | 0.312   | -0.32 (-0.49;-0.14)           | <0.001  | -0.30 (-0.47;-0.14)           | <0.001  |
|                                         |                  | PM <sub>2.5</sub> | 0.01 (-0.01;0.03)             | 0.376   | -0.24 (-0.40;-0.08)           | 0.004   | -0.23 (-0.39;-0.08)           | 0.004   |
|                                         |                  | NO <sub>2</sub>   | 0.01 (-0.01;0.03)             | 0.532   | -0.24 (-0.46;-0.02)           | 0.034   | -0.23 (-0.46;-0.01)           | 0.032   |
| With exposure x mediator interaction    |                  |                   |                               |         |                               |         |                               |         |
| FEV <sub>1</sub>                        | PM <sub>10</sub> | PM <sub>10</sub>  | -0.02 (-0.04;0.00)            | 0.046   | -0.28 (-0.45;-0.09)           | <0.001  | -0.30 (-0.46;-0.11)           | <0.001  |
|                                         |                  | PM <sub>2.5</sub> | -0.01 (-0.04;0.00)            | 0.056   | -0.20 (-0.35;-0.03)           | 0.016   | -0.21 (-0.37;-0.04)           | 0.008   |
|                                         |                  | NO <sub>2</sub>   | -0.02 (-0.06;0.00)            | 0.070   | -0.23 (-0.44;-0.02)           | 0.032   | -0.25 (-0.46;-0.04)           | 0.026   |
| FVC                                     | PM <sub>10</sub> | PM <sub>10</sub>  | -0.01 (-0.03;0.00)            | 0.184   | -0.29 (-0.45;-0.11)           | <0.001  | -0.30 (-0.46;-0.12)           | <0.001  |
|                                         |                  | PM <sub>2.5</sub> | -0.01 (-0.03;0.00)            | 0.188   | -0.21 (-0.36;-0.04)           | 0.014   | -0.22 (-0.37;-0.06)           | 0.008   |
|                                         |                  | NO <sub>2</sub>   | -0.02 (-0.05;0.01)            | 0.206   | -0.23 (-0.44;-0.02)           | 0.030   | -0.25 (-0.46;-0.03)           | 0.028   |
| FEV <sub>1</sub> /FVC                   | PM <sub>10</sub> | PM <sub>10</sub>  | 0.01 (-0.01;0.03)             | 0.466   | -0.33 (-0.50;-0.15)           | <0.001  | -0.32 (-0.49;-0.15)           | <0.001  |
|                                         |                  | PM <sub>2.5</sub> | 0.01 (-0.01;0.03)             | 0.582   | -0.25 (-0.41;-0.09)           | 0.006   | -0.25 (-0.40;-0.08)           | 0.006   |
|                                         |                  | NO <sub>2</sub>   | 0.01 (-0.01;0.03)             | 0.500   | -0.22 (-0.44;-0.01)           | 0.036   | -0.22 (-0.43;0.00)            | 0.042   |

Approach utilizing exposure and mediator averages with interaction.

All models were adjusted for age, height, body mass index (BMI), socioeconomic status, current and former smoking, exposure to second hand smoke (SHS), living in an urban vs. rural area, APOE  $\epsilon$ 4, physical activity and depression.

**Table S3:** Mediation analysis (exposure: air pollution; mediator: lung function; outcome: visuo-construction performance (figure copying)) in never-smokers (N=410). Indirect, direct and total effects (95% confidence intervals and p-values).

|                                         | Mediator         | Exposure          | Indirect effects           |         | Direct effects             |         | Total effects              |         |
|-----------------------------------------|------------------|-------------------|----------------------------|---------|----------------------------|---------|----------------------------|---------|
|                                         |                  |                   | $\beta$ -estimate (95%-CI) | p-value | $\beta$ -estimate (95%-CI) | p-value | $\beta$ -estimate (95%-CI) | p-value |
| Without exposure x mediator interaction |                  |                   |                            |         |                            |         |                            |         |
| FEV <sub>1</sub>                        | PM <sub>10</sub> | PM <sub>10</sub>  | -0.02 (-0.05;0.00)         | 0.064   | -0.34 (-0.53;-0.15)        | 0.002   | -0.36 (-0.55;-0.17)        | <0.001  |
|                                         |                  | PM <sub>2.5</sub> | -0.02 (-0.05;0.00)         | 0.068   | -0.26 (-0.43;-0.08)        | 0.004   | -0.27 (-0.45;-0.10)        | 0.002   |
|                                         |                  | NO <sub>2</sub>   | -0.02 (-0.05;0.01)         | 0.156   | -0.16 (-0.41;0.09)         | 0.198   | -0.18 (-0.43;0.07)         | 0.150   |
| FVC                                     | PM <sub>10</sub> | PM <sub>10</sub>  | -0.02 (-0.04;0.00)         | 0.114   | -0.34 (-0.53;-0.16)        | <0.001  | -0.36 (-0.54;-0.17)        | <0.001  |
|                                         |                  | PM <sub>2.5</sub> | -0.02 (-0.04;0.00)         | 0.112   | -0.26 (-0.43;-0.08)        | 0.004   | -0.27 (-0.44;-0.10)        | 0.002   |
|                                         |                  | NO <sub>2</sub>   | -0.02 (-0.06;0.01)         | 0.188   | -0.16 (-0.41;0.09)         | 0.204   | -0.18 (-0.42;0.07)         | 0.152   |
| FEV <sub>1</sub> /FVC                   | PM <sub>10</sub> | PM <sub>10</sub>  | 0.00 (-0.01;0.02)          | 0.674   | -0.35 (-0.54;-0.16)        | <0.001  | -0.34 (-0.54;-0.16)        | <0.001  |
|                                         |                  | PM <sub>2.5</sub> | 0.00 (-0.01;0.02)          | 0.756   | -0.26 (-0.44;-0.09)        | 0.002   | -0.26 (-0.44;-0.09)        | 0.002   |
|                                         |                  | NO <sub>2</sub>   | 0.00 (-0.01;0.02)          | 0.880   | -0.17 (-0.42;0.08)         | 0.182   | -0.17 (-0.41;0.08)         | 0.190   |
| With exposure x mediator interaction    |                  |                   |                            |         |                            |         |                            |         |
| FEV <sub>1</sub>                        | PM <sub>10</sub> | PM <sub>10</sub>  | -0.02 (-0.04;0.00)         | 0.118   | -0.32 (-0.51;-0.14)        | 0.004   | -0.33 (-0.52;-0.15)        | 0.002   |
|                                         |                  | PM <sub>2.5</sub> | -0.01 (-0.04;0.00)         | 0.126   | -0.23 (-0.41;-0.07)        | 0.012   | -0.25 (-0.42;-0.08)        | 0.012   |
|                                         |                  | NO <sub>2</sub>   | -0.02 (-0.06;0.01)         | 0.182   | -0.17 (-0.41;0.07)         | 0.172   | -0.19 (-0.43;0.05)         | 0.116   |
| FVC                                     | PM <sub>10</sub> | PM <sub>10</sub>  | 0.00 (-0.02;0.02)          | 0.982   | -0.37 (-0.56;-0.19)        | <0.001  | -0.37 (-0.56;-0.18)        | <0.001  |
|                                         |                  | PM <sub>2.5</sub> | 0.00 (-0.02;0.02)          | 0.962   | -0.28 (-0.45;-0.11)        | 0.004   | -0.28 (-0.45;-0.11)        | 0.006   |
|                                         |                  | NO <sub>2</sub>   | 0.00 (-0.01;0.02)          | 0.942   | -0.16 (-0.39;0.07)         | 0.208   | -0.15 (-0.39;0.08)         | 0.206   |
| FEV <sub>1</sub> /FVC                   | PM <sub>10</sub> | PM <sub>10</sub>  | -0.02 (-0.04;0.00)         | 0.118   | -0.32 (-0.51;-0.14)        | 0.004   | -0.33 (-0.52;-0.15)        | 0.002   |
|                                         |                  | PM <sub>2.5</sub> | -0.01 (-0.04;0.00)         | 0.126   | -0.23 (-0.41;-0.07)        | 0.012   | -0.25 (-0.42;-0.08)        | 0.012   |
|                                         |                  | NO <sub>2</sub>   | -0.02 (-0.06;0.01)         | 0.182   | -0.17 (-0.41;0.07)         | 0.172   | -0.19 (-0.43;0.05)         | 0.116   |

Approach utilizing exposure and mediator averages with interaction.

All models were adjusted for age, height, body mass index (BMI), socioeconomic status, exposure to second hand smoke (SHS), living in an urban vs. rural area, APOE ε4, physical activity and depression.

**Table S4:** Mediation analysis (exposure: air pollution; mediator: lung function; outcome: visuo-construction performance (figure copying)) in non-APOEε4 carriers (N=369). Indirect, direct and total effects (95% confidence intervals and p-values).

|                                         | Mediator         | Exposure          | Indirect effects    |         | Direct effects      |         | Total effects       |         |
|-----------------------------------------|------------------|-------------------|---------------------|---------|---------------------|---------|---------------------|---------|
|                                         |                  |                   | β-estimate (95%-CI) | p-value | β-estimate (95%-CI) | p-value | β-estimate (95%-CI) | p-value |
| Without exposure x mediator interaction |                  |                   |                     |         |                     |         |                     |         |
| FEV <sub>1</sub>                        | PM <sub>10</sub> | PM <sub>10</sub>  | -0.02 (-0.06;0.00)  | 0.032   | -0.19 (-0.38;-0.01) | 0.034   | -0.21 (-0.40;-0.03) | 0.020   |
|                                         |                  | PM <sub>2.5</sub> | -0.02 (-0.06;0.00)  | 0.038   | -0.15 (-0.32;0.02)  | 0.070   | -0.17 (-0.35;0.00)  | 0.046   |
|                                         |                  | NO <sub>2</sub>   | -0.02 (-0.06;0.00)  | 0.124   | -0.11 (-0.34;0.11)  | 0.334   | -0.13 (-0.36;0.09)  | 0.240   |
| FVC                                     | PM <sub>10</sub> | PM <sub>10</sub>  | -0.01 (-0.04;0.01)  | 0.254   | -0.20 (-0.39;-0.03) | 0.022   | -0.21 (-0.40;-0.04) | 0.016   |
|                                         |                  | PM <sub>2.5</sub> | -0.01 (-0.04;0.01)  | 0.254   | -0.16 (-0.33;0.01)  | 0.058   | -0.17 (-0.34;-0.01) | 0.044   |
|                                         |                  | NO <sub>2</sub>   | -0.01 (-0.06;0.02)  | 0.376   | -0.12 (-0.35;0.10)  | 0.286   | -0.13 (-0.36;0.09)  | 0.246   |
| FEV <sub>1</sub> /FVC                   | PM <sub>10</sub> | PM <sub>10</sub>  | 0.01 (-0.02;0.04)   | 0.506   | -0.21 (-0.40;-0.04) | 0.018   | -0.20 (-0.39;-0.03) | 0.026   |
|                                         |                  | PM <sub>2.5</sub> | 0.01 (-0.02;0.03)   | 0.564   | -0.17 (-0.35;0.00)  | 0.046   | -0.16 (-0.33;0.00)  | 0.054   |
|                                         |                  | NO <sub>2</sub>   | 0.00 (-0.02;0.03)   | 0.674   | -0.13 (-0.36;0.09)  | 0.260   | -0.12 (-0.36;0.10)  | 0.278   |
| With exposure x mediator interaction    |                  |                   |                     |         |                     |         |                     |         |
| FEV <sub>1</sub>                        | PM <sub>10</sub> | PM <sub>10</sub>  | -0.02 (-0.06;0.00)  | 0.046   | -0.19 (-0.38;0.01)  | 0.066   | -0.21 (-0.40;-0.02) | 0.032   |
|                                         |                  | PM <sub>2.5</sub> | -0.02 (-0.05;0.00)  | 0.060   | -0.14 (-0.31;0.04)  | 0.118   | -0.16 (-0.33;0.02)  | 0.088   |
|                                         |                  | NO <sub>2</sub>   | -0.02 (-0.07;0.01)  | 0.128   | -0.13 (-0.36;0.10)  | 0.296   | -0.15 (-0.38;0.08)  | 0.204   |
| FVC                                     | PM <sub>10</sub> | PM <sub>10</sub>  | -0.01 (-0.04;0.01)  | 0.272   | -0.20 (-0.39;-0.01) | 0.040   | -0.21 (-0.40;-0.02) | 0.030   |
|                                         |                  | PM <sub>2.5</sub> | -0.01 (-0.04;0.01)  | 0.278   | -0.15 (-0.33;0.03)  | 0.096   | -0.16 (-0.34;0.02)  | 0.076   |
|                                         |                  | NO <sub>2</sub>   | -0.01 (-0.05;0.02)  | 0.376   | -0.13 (-0.36;0.10)  | 0.270   | -0.14 (-0.38;0.08)  | 0.218   |
| FEV <sub>1</sub> /FVC                   | PM <sub>10</sub> | PM <sub>10</sub>  | 0.01 (-0.02;0.04)   | 0.596   | -0.24 (-0.42;-0.04) | 0.014   | -0.23 (-0.42;-0.04) | 0.014   |
|                                         |                  | PM <sub>2.5</sub> | 0.00 (-0.02;0.03)   | 0.718   | -0.19 (-0.36;-0.01) | 0.038   | -0.19 (-0.36;-0.01) | 0.042   |
|                                         |                  | NO <sub>2</sub>   | 0.01 (-0.01;0.04)   | 0.560   | -0.12 (-0.35;0.10)  | 0.298   | -0.12 (-0.35;0.11)  | 0.332   |

Approach utilizing exposure and mediator averages with interaction.

All models were adjusted for age, height, body mass index (BMI), socioeconomic status, current and former smoking, exposure to second hand smoke (SHS), living in an urban vs. rural area, , physical activity and depression.
